# Supplementary material for: Molecular Networking Revealed Unique UV-Absorbing Phospholipids: Favilipids from the Marine Sponge Clathria faviformis
Source: MDPI journal article supplement (doi:10.3390/md21020058), 2023-01-18
Supplement: s1 [file s1]

## Supplementary Material

- Figure S1.** Positive ion mode high-resolution ESI mass spectrum of favilipid A (**1**).
- Figure S2.**  $^1\text{H}$ -NMR spectrum of favilipid A (**1**) (700 MHz,  $\text{CD}_3\text{OD}$ ).
- Figure S3.** COSY spectrum of favilipid A (**1**) (700 MHz,  $\text{CD}_3\text{OD}$ ).
- Figure S4.** TOCSY spectrum of favilipid A (**1**) (700 MHz,  $\text{CD}_3\text{OD}$ ).
- Figure S5.** ROESY spectrum of favilipid A (**1**) (700 MHz,  $\text{CD}_3\text{OD}$ ).
- Figure S6.**  $^{13}\text{C}$ -HSQC spectrum of favilipid A (**1**) (700 MHz,  $\text{CD}_3\text{OD}$ ).
- Figure S7.**  $^{13}\text{C}$ -HMBC spectrum of favilipid A (**1**) (700 MHz,  $\text{CD}_3\text{OD}$ ).
- Figure S8.**  $^{31}\text{P}$ -HMBC spectrum of favilipid A (**1**) (700 MHz,  $\text{CD}_3\text{OD}$ ).
- Figure S9.** UV and ECD spectra of favilipid A (**1**) in MeOH.
- Figure S10.** UV and ECD spectra of individual conformers and predicted average spectra of favilipid A (**1**) in MeOH
- Figure S11.** Interpretation of  $\text{MS}^2$  and  $\text{MS}^3$  spectra of favilipid A (**1**).
- Figure S12.**  $\text{MS}^2$  and  $\text{MS}^3$  spectra of favilipid A (**1**) and of its isomer **2**.
- Table S1.** Cartesian coordinates of the 16 low-energy conformers of the model compound **1m** of favilipid A.

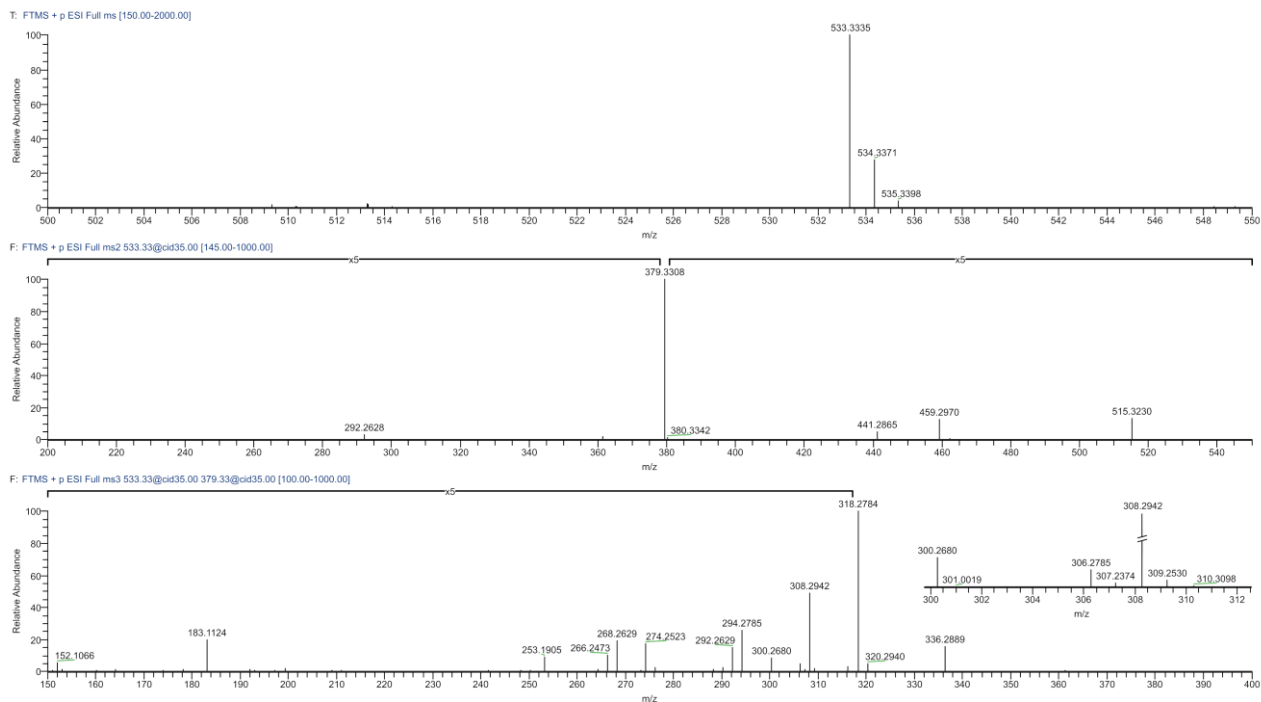

**Figure S1.** High resolution ESI MS data of favilipid A (**1**): MS spectrum (top panel), 533.33→MS<sup>2</sup> spectrum (middle panel), and 533.33→379.33→MS<sup>3</sup> spectrum (bottom panel).

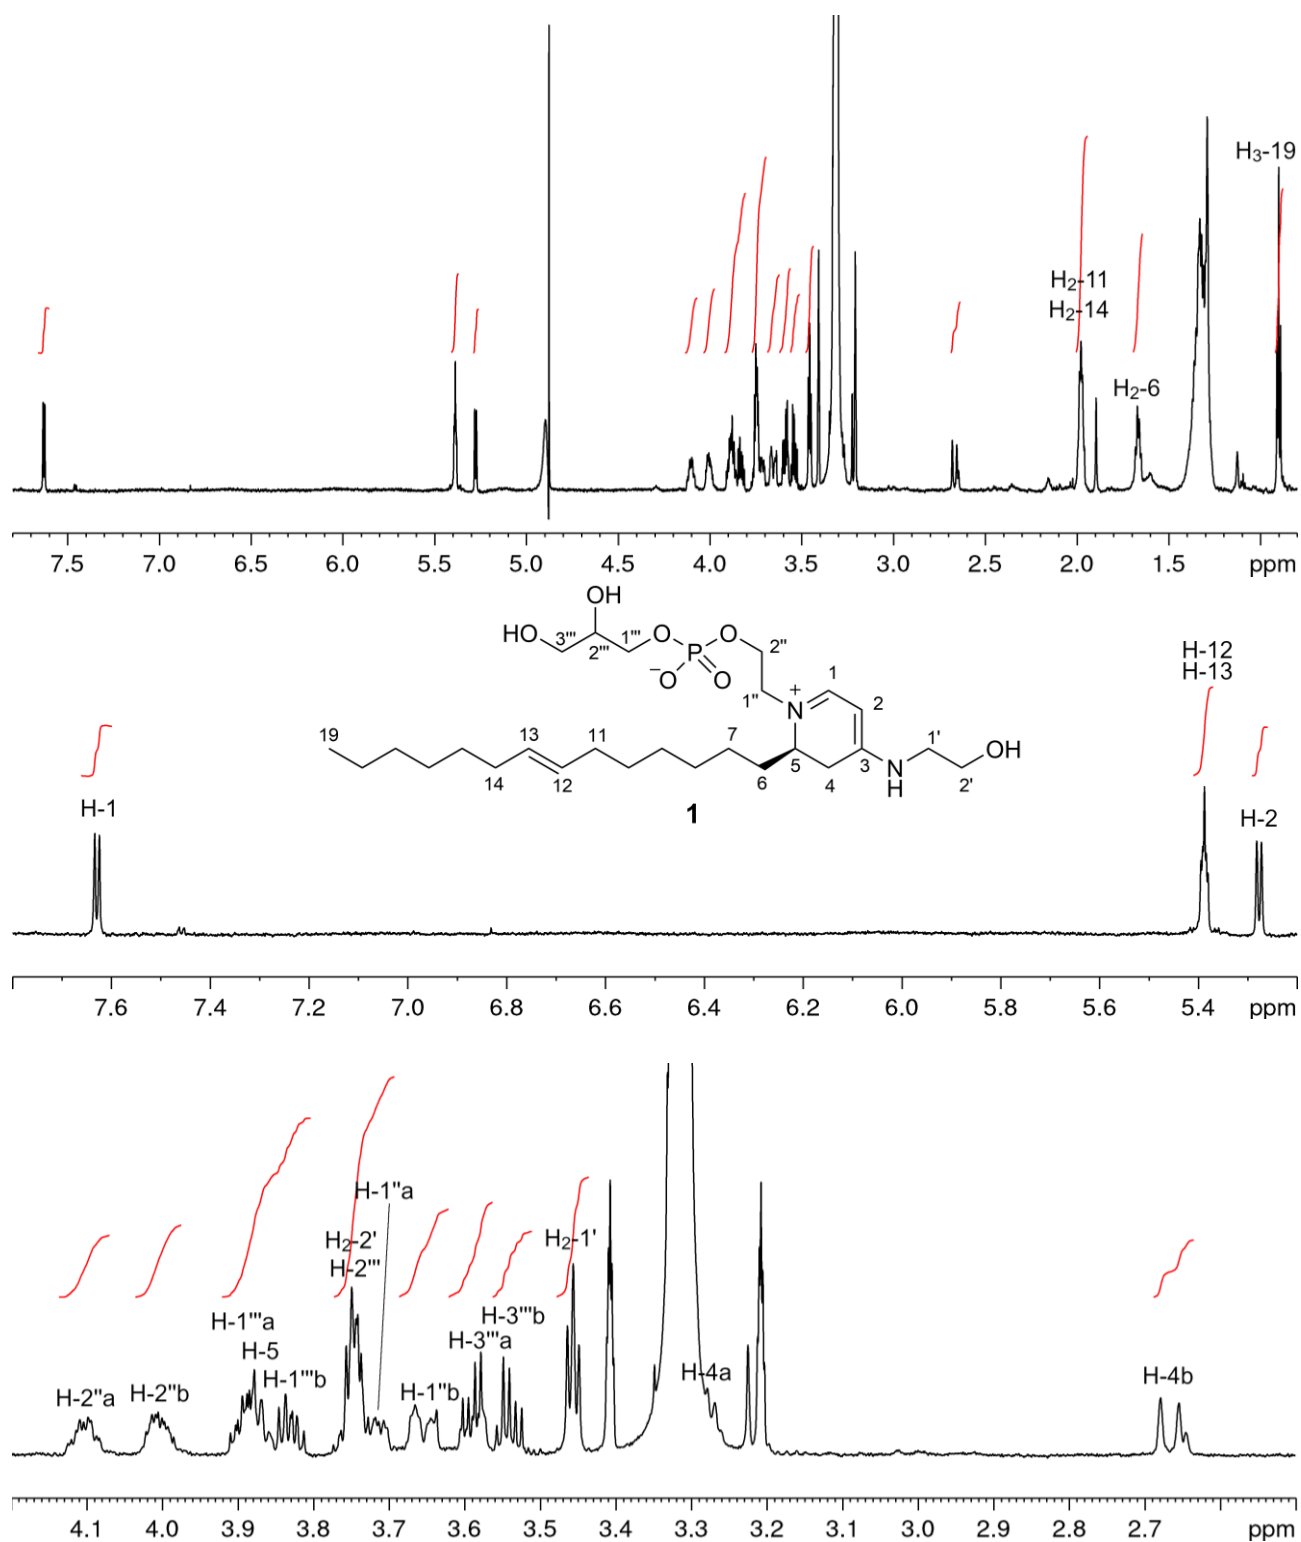

**Figure S2.**  $^1\text{H}$ -NMR spectrum of favilipid A (1) (700 MHz,  $\text{CD}_3\text{OD}$ ): full spectrum (top panel), low-field expansion (middle panel), middle-field expansion (bottom panel)

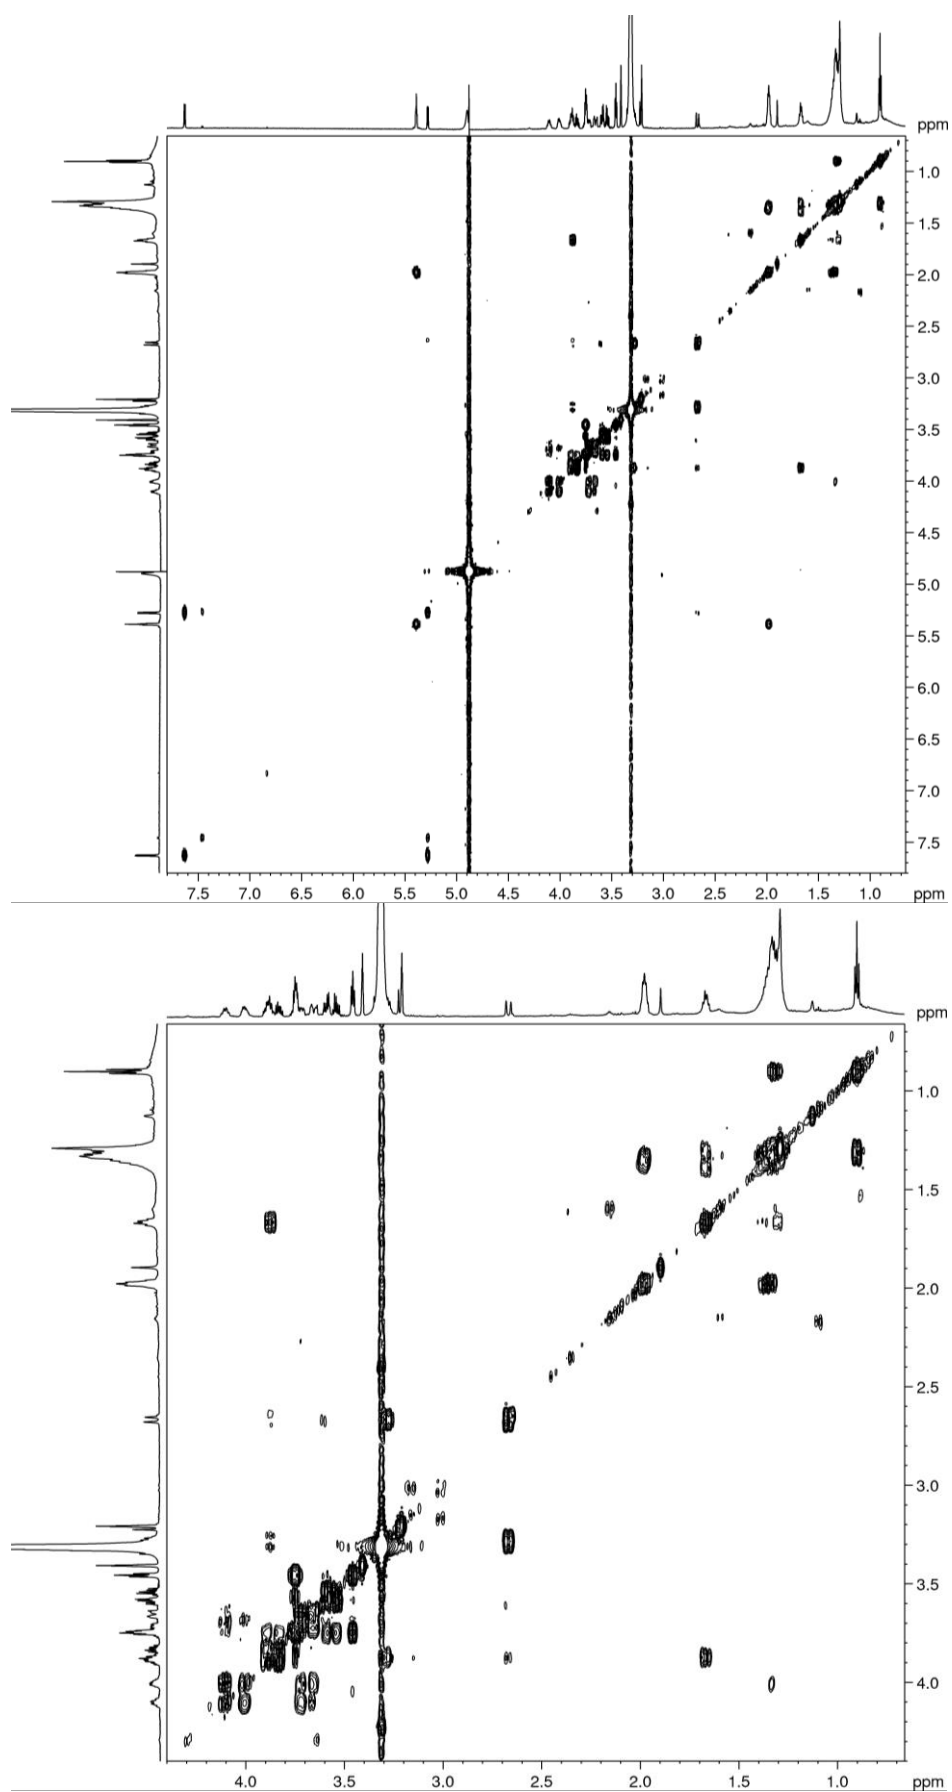

**Figure S3.** COSY spectrum of favilipid A (**1**) (700 MHz, CD<sub>3</sub>OD): full spectrum (top panel), high-field expansion (bottom panel)

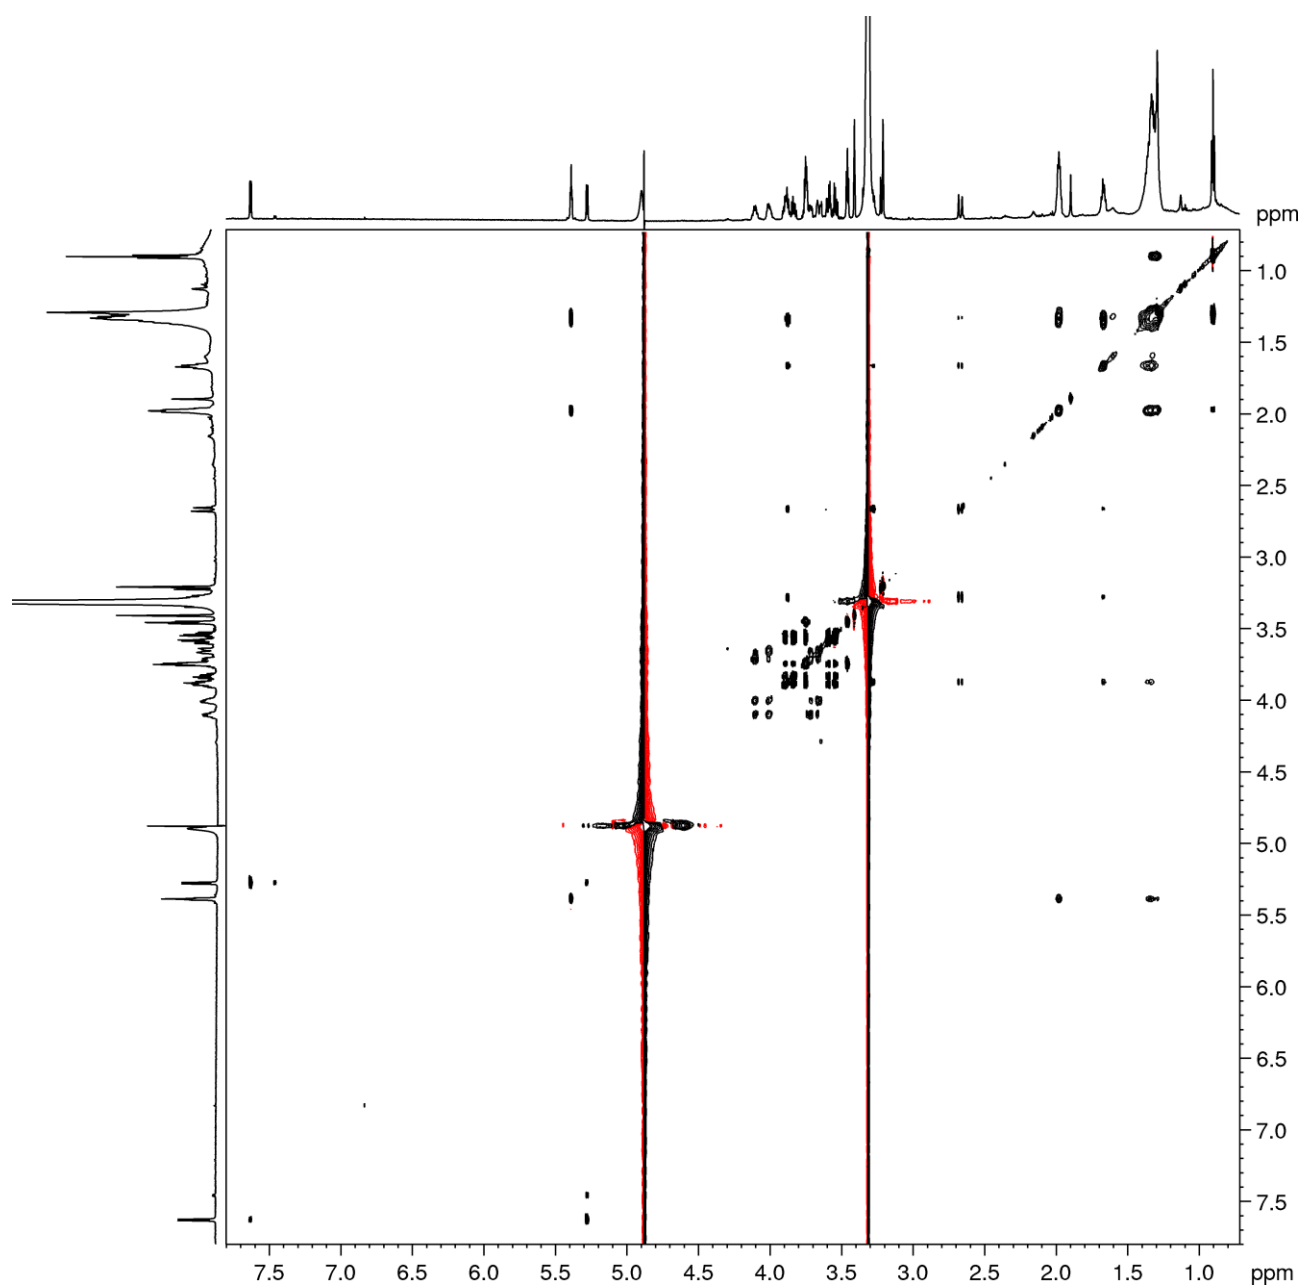

**Figure S4.** TOCSY spectrum of favilipid A (**1**) (700 MHz, CD<sub>3</sub>OD).

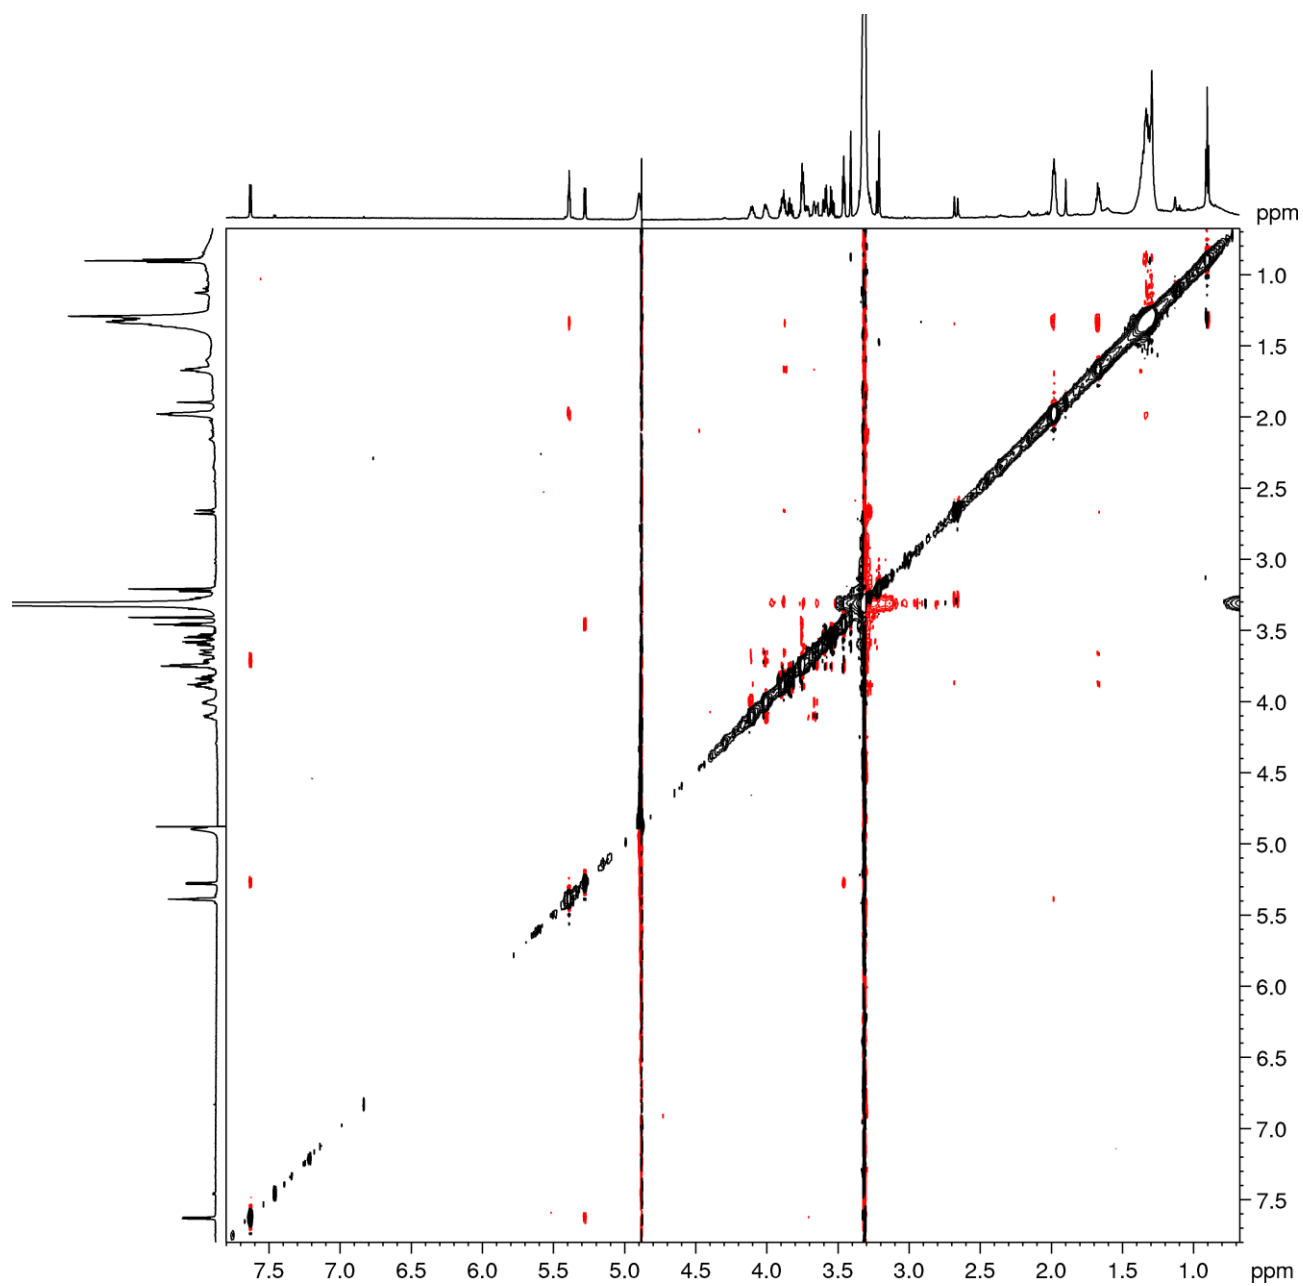

**Figure S5.** ROESY spectrum of favilipid A (**1**) (700 MHz, CD<sub>3</sub>OD).

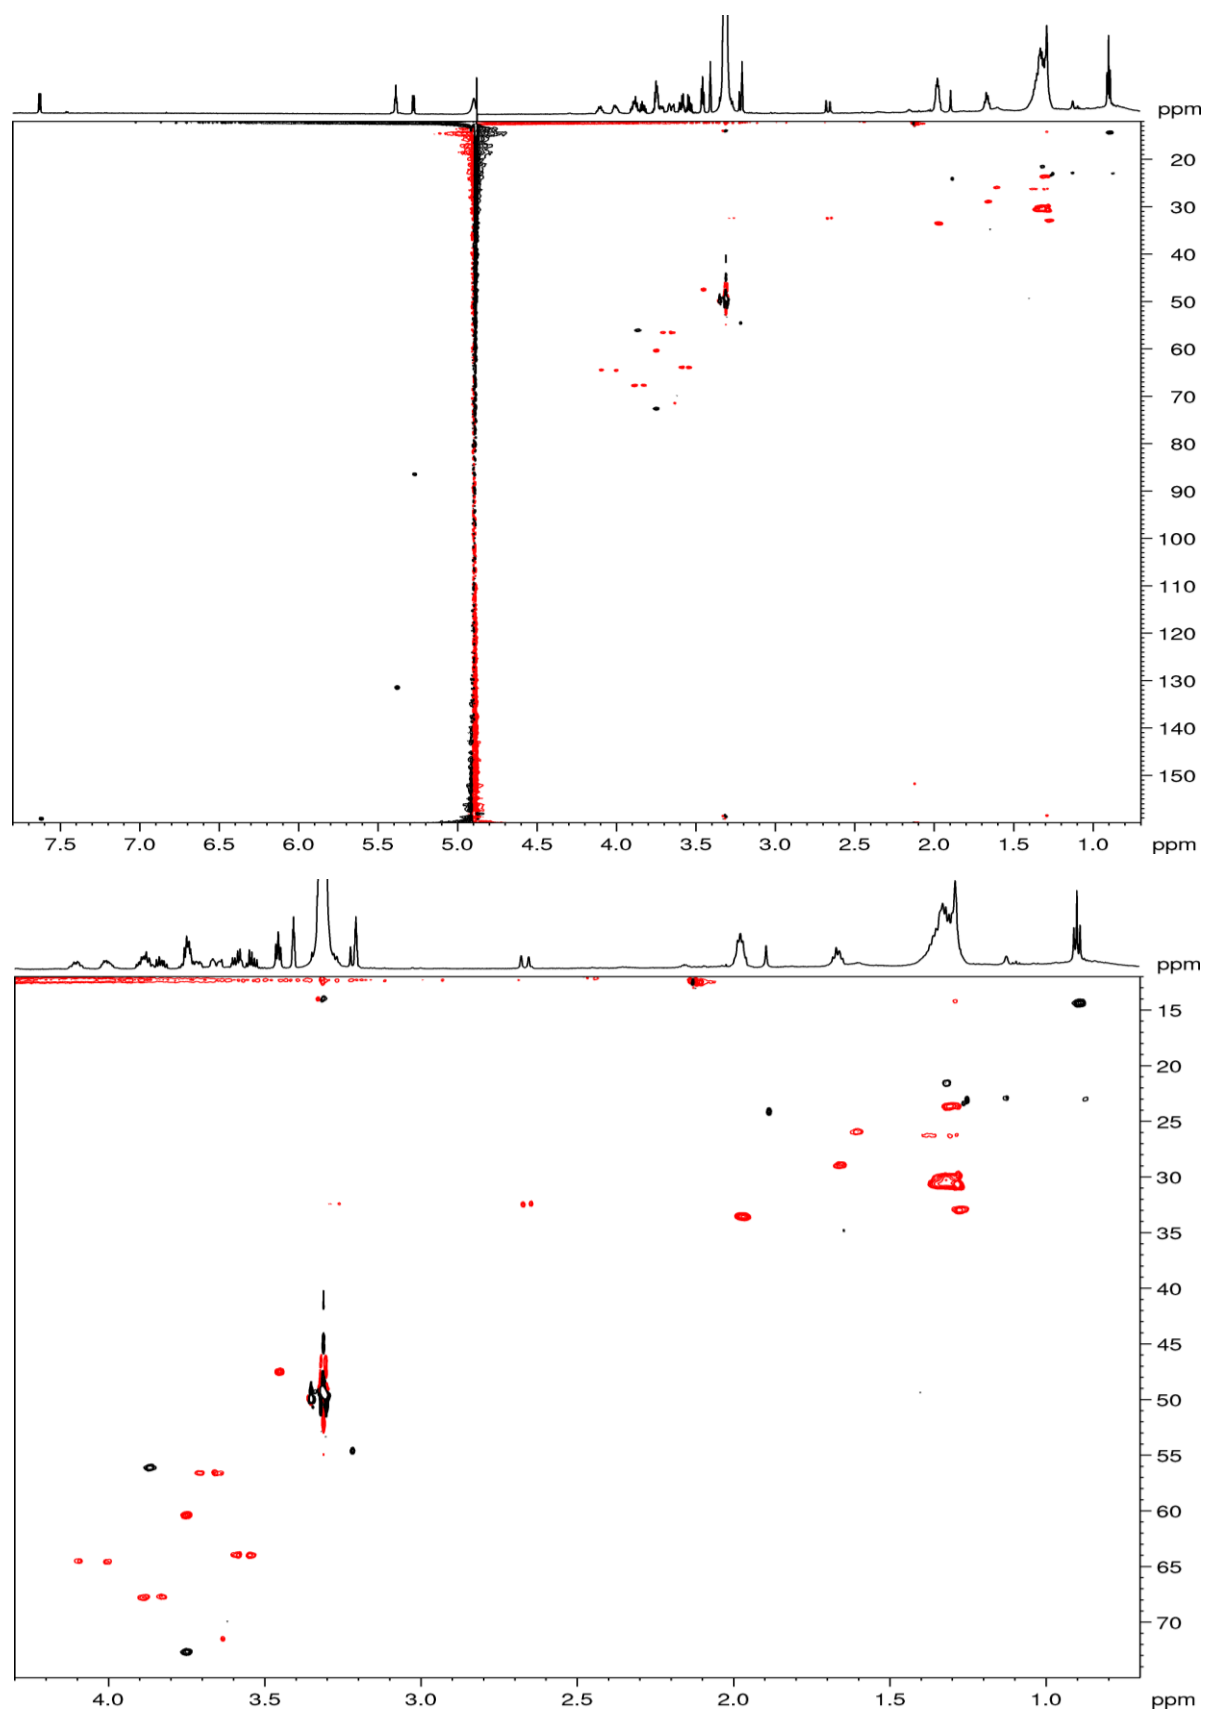

**Figure S6.**  $^{13}\text{C}$ -HSQC spectrum of favilipid A (**1**) (700 MHz,  $\text{CD}_3\text{OD}$ ): full spectrum (top panel), high-field expansion (bottom panel)

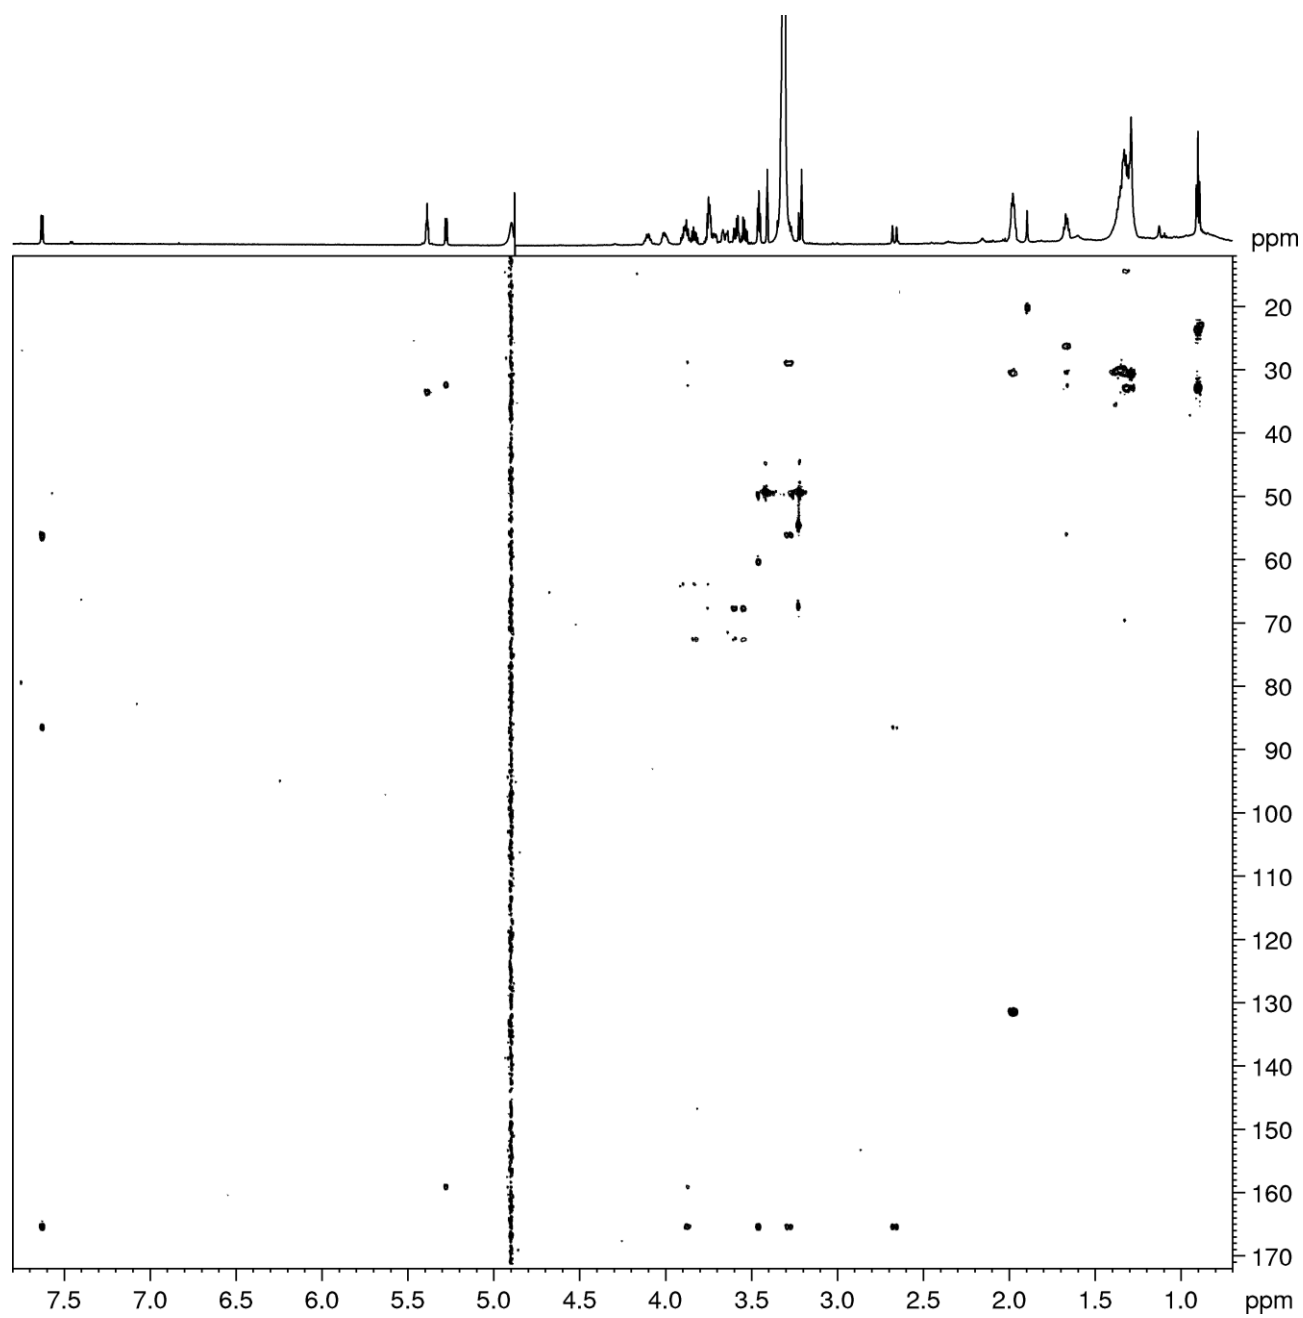

**Figure S7.**  $^{13}\text{C}$ -HMBC spectrum of favilipid A (1) (700 MHz,  $\text{CD}_3\text{OD}$ ).



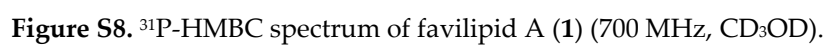

**Figure S8.**  $^{31}\text{P}$ -HMBC spectrum of favilipid A (**1**) (700 MHz,  $\text{CD}_3\text{OD}$ ).

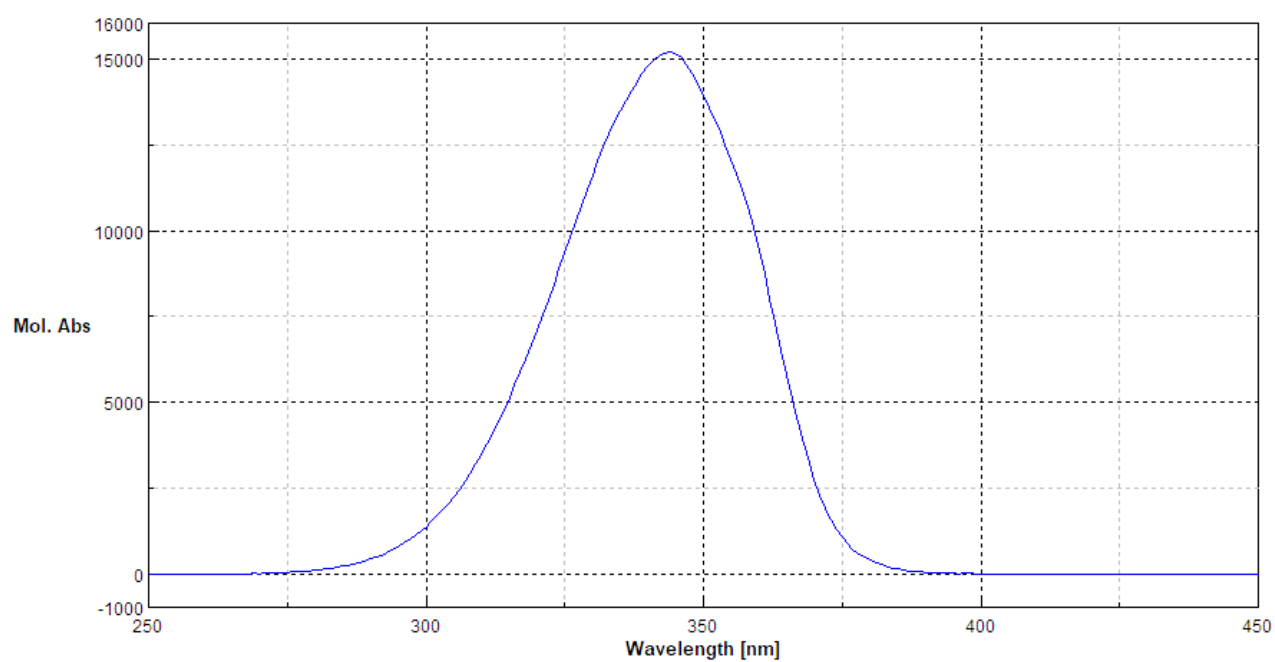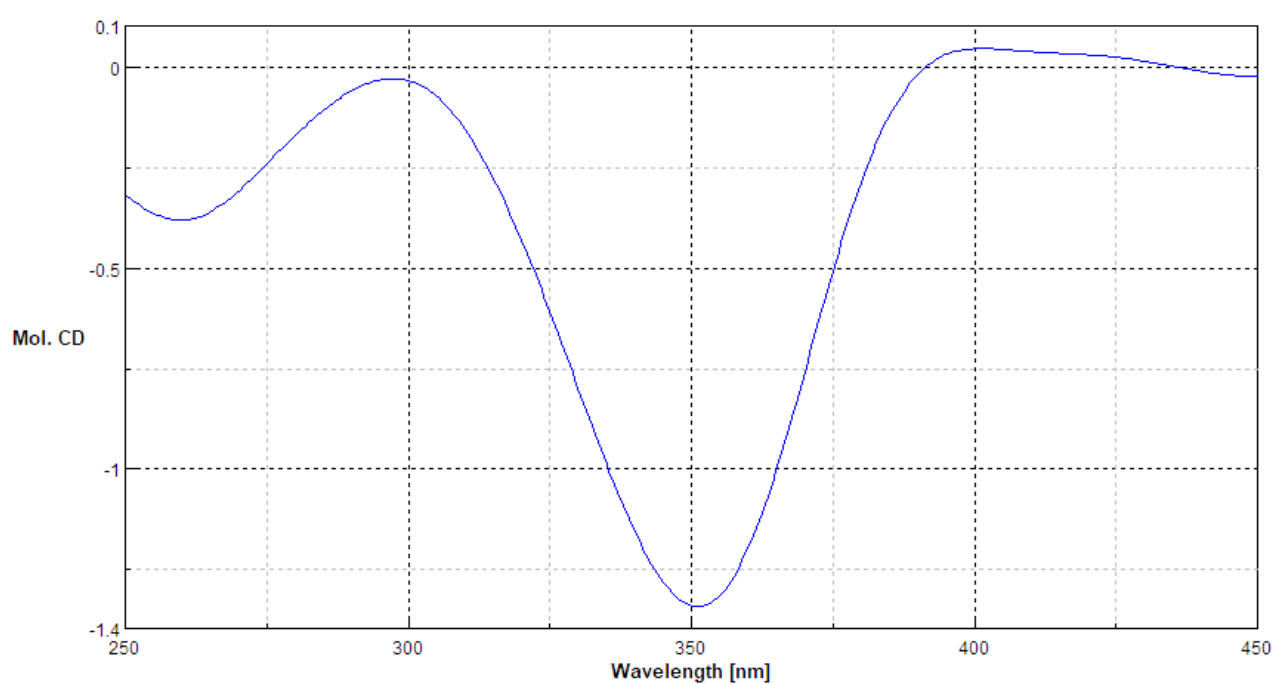

**Figure S9.** UV and ECD spectra of favilipid A (1) in MeOH.

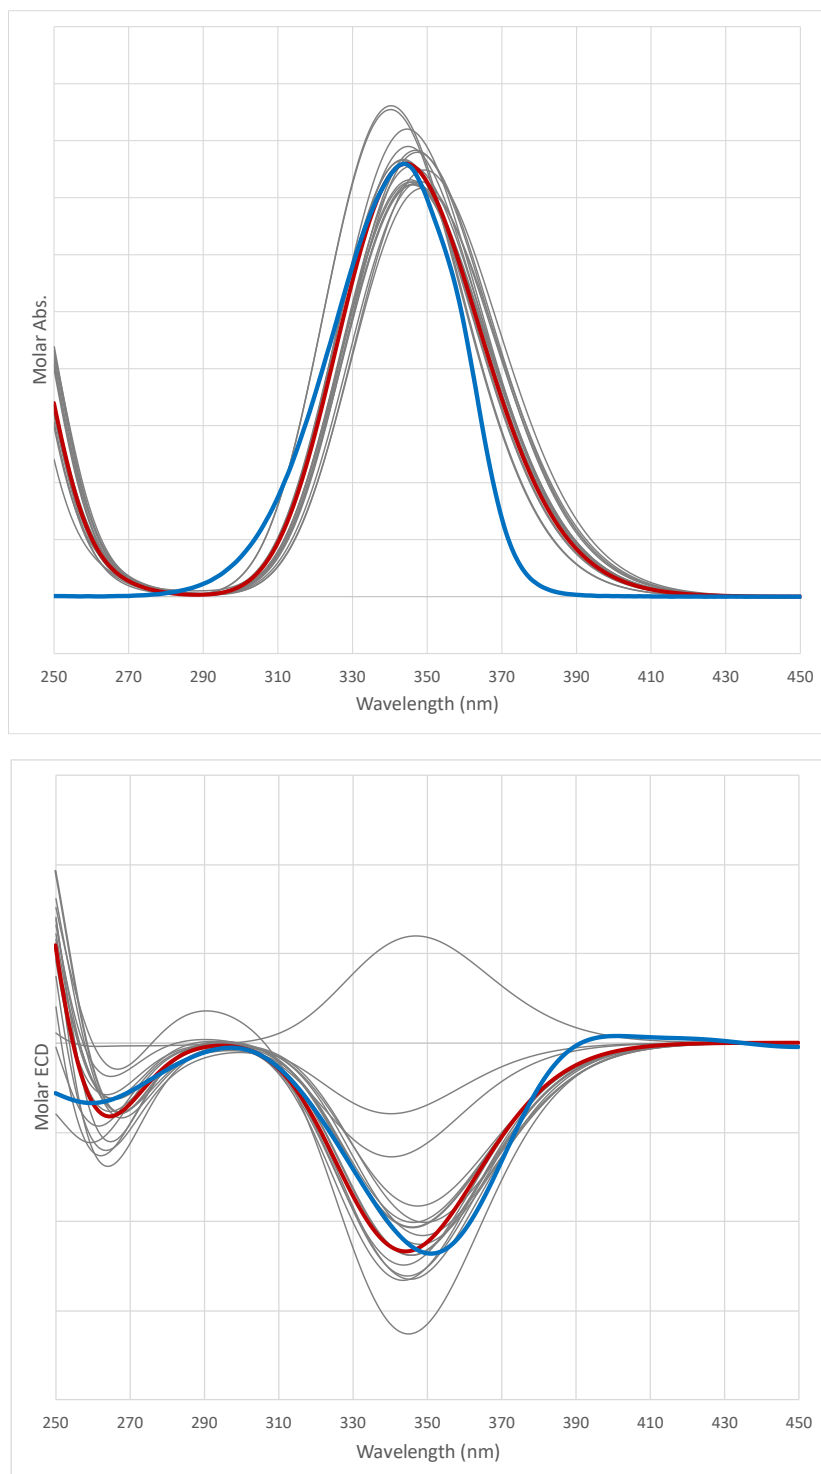

**Figure S10.** UV (top panel) and ECD (bottom panel) spectra of individual conformers and predicted average spectra of favilipid A (**1**) in MeOH.

*Grey lines:* spectra of individual conformers calculated at the B3LYP/6-311+G(2d,p)/SMD(MeOH)//B3LYP/6-31G(d,p)/SMD(MeOH) level of theory. The half-band width  $\sigma = 0.35$  eV was used to generate the spectra. All the predicted spectra are shifted by +37 nm to match experimental and predicted UV maxima (see text for details). The only conformer showing positive ECD at 350 nm is conformer #11, whose population is 1.3%.

*Red line:* average UV and ECD spectra according to the Boltzmann statistics and B3LYP/6-31G+(d,p)/SMD(MeOH) energies.

*Blue line:* experimental UV and ECD spectra.

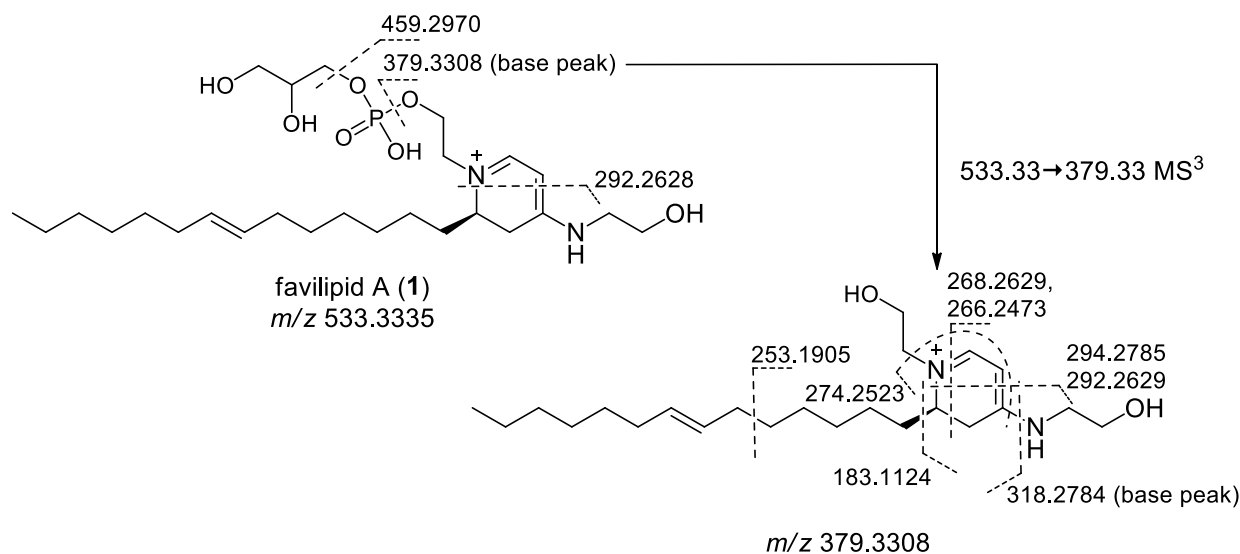

**Figure S11.** Interpretation of MS<sup>2</sup> and MS<sup>3</sup> spectra of favilipid A (1).

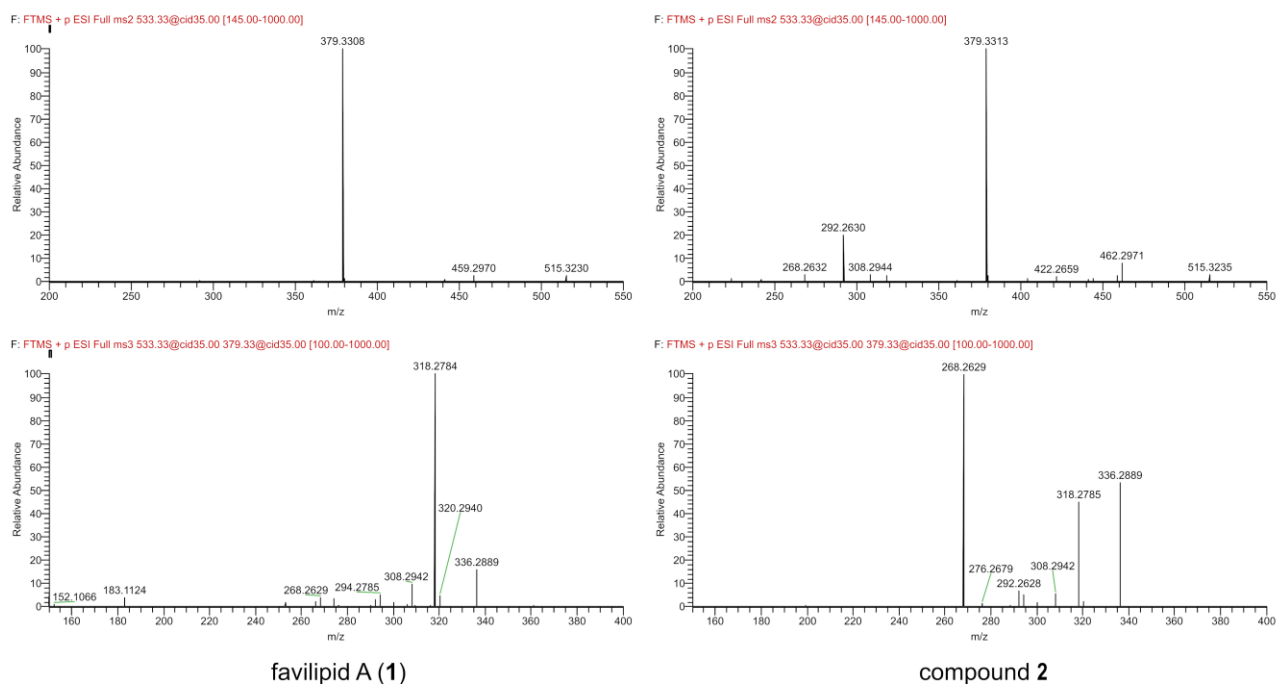

**Figure S12.** 533.33→MS<sup>2</sup> and 533.33→379.33→MS<sup>3</sup> spectra of favilipid A (1) and of its isomer 2.

**Table S1.** Cartesian coordinates of the 16 low-energy conformers of the model compound **1m** of favilipid A used for prediction of the ECD spectrum.

|                                                              |          |          |          |
|--------------------------------------------------------------|----------|----------|----------|
| favilipd model compound conf #01                             |          |          |          |
| Energy at B3LYP/6-31+G(d,p)/SMD(MeOH): -1183.7668160 Hartree |          |          |          |
| C                                                            | -1.30690 | 0.27700  | -1.52780 |
| C                                                            | -2.29580 | 1.16970  | -1.10170 |
| C                                                            | -2.79880 | 1.04880  | 0.19640  |
| C                                                            | -2.16920 | 0.01790  | 1.09990  |
| C                                                            | -1.72000 | -1.23230 | 0.33240  |
| C                                                            | -2.86800 | -2.17390 | -0.09050 |
| C                                                            | -3.55430 | -2.86550 | 1.09200  |
| C                                                            | -4.37220 | 2.94700  | 0.00270  |
| C                                                            | 0.15250  | -1.66790 | -1.33080 |
| C                                                            | 1.44410  | -1.43710 | -0.55910 |
| C                                                            | 5.44960  | -0.12950 | 0.72050  |
| H                                                            | -0.78660 | 0.46130  | -2.46380 |
| H                                                            | -2.58670 | 1.97420  | -1.76430 |
| H                                                            | -1.29700 | 0.49250  | 1.56950  |
| H                                                            | -2.85090 | -0.26400 | 1.90600  |
| H                                                            | -1.03020 | -1.78770 | 0.97320  |
| H                                                            | -5.11370 | 3.39190  | 0.66640  |
| H                                                            | -2.44770 | -2.93800 | -0.75450 |
| H                                                            | -3.60290 | -1.61180 | -0.67970 |
| H                                                            | -4.31150 | -3.56890 | 0.72900  |
| H                                                            | -2.83240 | -3.43240 | 1.69240  |
| H                                                            | -3.63750 | 3.71020  | -0.27490 |
| H                                                            | -4.87260 | 2.58850  | -0.90240 |
| H                                                            | -4.05900 | -2.15460 | 1.75490  |
| H                                                            | -0.13870 | -2.71660 | -1.21250 |
| H                                                            | 0.31350  | -1.47720 | -2.39500 |
| H                                                            | 1.29040  | -1.57330 | 0.51570  |
| H                                                            | 2.19330  | -2.15800 | -0.90510 |
| H                                                            | 6.20210  | -0.82180 | 0.33750  |
| H                                                            | 5.22250  | -0.37580 | 1.76250  |
| H                                                            | 5.83350  | 0.89430  | 0.65650  |
| H                                                            | -3.99690 | 1.69180  | 1.67600  |
| N                                                            | -0.95000 | -0.81740 | -0.86990 |
| N                                                            | -3.73300 | 1.84170  | 0.70870  |
| O                                                            | 4.28100  | -0.29400 | -0.11010 |
| O                                                            | 1.90710  | -0.09800 | -0.82710 |
| O                                                            | 3.16490  | 2.03790  | -0.38260 |
| O                                                            | 2.53650  | 0.49000  | 1.63180  |
| P                                                            | 2.96050  | 0.64630  | 0.18260  |

|                                                              |          |          |          |
|--------------------------------------------------------------|----------|----------|----------|
| favilipd model compound conf #02                             |          |          |          |
| Energy at B3LYP/6-31+G(d,p)/SMD(MeOH): -1183.7654640 Hartree |          |          |          |
| C                                                            | 1.35780  | -0.06340 | 1.41000  |
| C                                                            | 2.20670  | 1.00740  | 1.11290  |
| C                                                            | 2.58020  | 1.22010  | -0.21770 |
| C                                                            | 1.98860  | 0.31120  | -1.26760 |
| C                                                            | 1.78290  | -1.11360 | -0.73720 |
| C                                                            | 3.11190  | -1.88740 | -0.61180 |
| C                                                            | 2.98400  | -3.35100 | -0.18110 |
| C                                                            | 3.91950  | 3.24520  | 0.25200  |
| C                                                            | -0.00180 | -2.00700 | 0.86080  |
| C                                                            | -1.33150 | -1.61420 | 0.23000  |
| C                                                            | -5.26700 | 0.12130  | -0.77190 |
| H                                                            | 0.89330  | -0.12610 | 2.39010  |
| H                                                            | 2.47110  | 1.69540  | 1.90500  |
| H                                                            | 1.02340  | 0.74460  | -1.56320 |
| H                                                            | 2.61920  | 0.28130  | -2.16060 |
| H                                                            | 1.12520  | -1.64480 | -1.42990 |
| H                                                            | 4.52820  | 3.91340  | -0.35710 |
| H                                                            | 3.77820  | -1.35730 | 0.07960  |
| H                                                            | 3.58560  | -1.84200 | -1.60020 |
| H                                                            | 3.96800  | -3.83250 | -0.19960 |
| H                                                            | 2.59410  | -3.44810 | 0.83780  |
| H                                                            | 3.12860  | 3.82580  | 0.73850  |
| H                                                            | 4.55070  | 2.78860  | 1.02090  |
| H                                                            | 2.32640  | -3.91330 | -0.85470 |
| H                                                            | 0.28420  | -2.98920 | 0.47790  |
| H                                                            | -0.10850 | -2.07880 | 1.94670  |
| H                                                            | -1.22670 | -1.48530 | -0.85160 |
| H                                                            | -2.06260 | -2.40660 | 0.42520  |
| H                                                            | -6.04200 | -0.63500 | -0.63240 |

|   |          |          |          |
|---|----------|----------|----------|
| H | -5.01390 | 0.19350  | -1.83450 |
| H | -5.63500 | 1.08810  | -0.41170 |
| H | 3.53060  | 2.30710  | -1.61510 |
| N | 1.06830  | -1.04670 | 0.56680  |
| N | 3.35170  | 2.22270  | -0.62060 |
| O | -4.12630 | -0.31380 | -0.00250 |
| O | -1.78640 | -0.38750 | 0.83510  |
| O | -2.98810 | 1.82210  | 0.94950  |
| O | -2.29220 | 0.87240  | -1.38840 |
| P | -2.78020 | 0.63540  | 0.02970  |

favilipd model compound conf #03

Energy at B3LYP/6-31+G(d,p)/SMD(MeOH): -1183.7646274 Hartree

|   |          |          |          |
|---|----------|----------|----------|
| C | 1.12930  | 0.26360  | 1.45560  |
| C | 2.00890  | 1.28860  | 1.09300  |
| C | 2.62880  | 1.23460  | -0.15820 |
| C | 2.23600  | 0.11400  | -1.08910 |
| C | 1.90700  | -1.18220 | -0.33700 |
| C | 3.13520  | -1.94820 | 0.20000  |
| C | 4.02960  | -2.51930 | -0.90500 |
| C | 3.87810  | 3.34970  | 0.12650  |
| C | -0.01360 | -1.87310 | 1.17920  |
| C | -1.27640 | -1.80810 | 0.33240  |
| C | -4.57150 | 2.11960  | 0.02220  |
| H | 0.51450  | 0.37330  | 2.34450  |
| H | 2.12550  | 2.13130  | 1.76160  |
| H | 1.34850  | 0.45240  | -1.64080 |
| H | 3.01820  | -0.07370 | -1.82830 |
| H | 1.36060  | -1.83590 | -1.02220 |
| H | 4.59890  | 3.89590  | -0.48210 |
| H | 2.76760  | -2.77190 | 0.82300  |
| H | 3.71800  | -1.29030 | 0.85650  |
| H | 4.83310  | -3.12030 | -0.46540 |
| H | 3.45940  | -3.16790 | -1.58120 |
| H | 3.01680  | 3.99570  | 0.32700  |
| H | 4.34770  | 3.07710  | 1.07680  |
| H | 4.50020  | -1.73460 | -1.50680 |
| H | 0.42560  | -2.86950 | 1.07210  |
| H | -0.26300 | -1.72080 | 2.23260  |
| H | -1.03750 | -1.90300 | -0.73280 |
| H | -1.93660 | -2.63320 | 0.62290  |
| H | -4.59290 | 2.97250  | 0.70310  |
| H | -5.52870 | 1.59030  | 0.07090  |
| H | -4.39280 | 2.47240  | -0.99870 |
| H | 3.83670  | 2.04170  | -1.54740 |
| N | 0.98800  | -0.87450 | 0.79030  |
| N | 3.47310  | 2.15570  | -0.60820 |
| O | -3.49270 | 1.26990  | 0.46770  |
| O | -1.92690 | -0.54720 | 0.58360  |
| O | -2.72710 | 0.19990  | -1.77540 |
| O | -4.34340 | -1.09770 | -0.20150 |
| P | -3.19830 | -0.11230 | -0.36490 |

favilipd model compound conf #04

Energy at B3LYP/6-31+G(d,p)/SMD(MeOH): -1183.7645088 Hartree

|   |          |          |          |
|---|----------|----------|----------|
| C | -1.87210 | 1.17080  | -1.32900 |
| C | -3.08380 | 1.31040  | -0.64460 |
| C | -3.29660 | 0.55170  | 0.51010  |
| C | -2.15440 | -0.29600 | 1.01280  |
| C | -1.30690 | -0.86690 | -0.13090 |
| C | -1.96170 | -2.03190 | -0.90430 |
| C | -2.12440 | -3.30540 | -0.06810 |
| C | -5.56750 | 1.43250  | 0.94080  |
| C | 0.30170  | 0.17880  | -1.81130 |
| C | 1.38390  | 1.05640  | -1.19300 |
| C | 5.54780  | 0.80150  | 0.32960  |
| H | -1.62660 | 1.86200  | -2.13150 |
| H | -3.79520 | 2.04690  | -0.99440 |
| H | -1.52760 | 0.34950  | 1.64320  |
| H | -2.51820 | -1.10590 | 1.64960  |
| H | -0.36200 | -1.21330 | 0.29270  |
| H | -6.33200 | 1.23060  | 1.69100  |
| H | -1.32770 | -2.25360 | -1.77060 |
| H | -2.93370 | -1.70980 | -1.29770 |
| H | -2.51270 | -4.11770 | -0.69220 |
| H | -1.16300 | -3.63280 | 0.34560  |
| H | -5.30250 | 2.49450  | 0.97750  |
| H | -5.96920 | 1.19950  | -0.05040 |

|   |          |          |          |
|---|----------|----------|----------|
| H | -2.82260 | -3.17120 | 0.76490  |
| H | 0.63230  | -0.86140 | -1.84560 |
| H | 0.13430  | 0.51720  | -2.83900 |
| H | 2.27390  | 1.01540  | -1.82850 |
| H | 1.04570  | 2.09550  | -1.13430 |
| H | 6.05720  | 1.76160  | 0.22440  |
| H | 5.82570  | 0.14740  | -0.50290 |
| H | 5.84000  | 0.33880  | 1.27850  |
| H | -4.44330 | 0.02860  | 2.07380  |
| N | -0.97370 | 0.22750  | -1.08160 |
| N | -4.40810 | 0.59680  | 1.23490  |
| O | 4.13290  | 1.08390  | 0.30790  |
| O | 1.69180  | 0.65030  | 0.15830  |
| O | 2.97410  | -0.54560 | 1.96770  |
| O | 3.35490  | -1.23630 | -0.53010 |
| P | 3.07150  | -0.16160 | 0.50460  |

favilipd model compound conf #05

Energy at B3LYP/6-31+G(d,p)/SMD(MeOH): -1183.7643324 Hartree

|   |          |          |          |
|---|----------|----------|----------|
| C | 1.30210  | -0.05690 | 1.30160  |
| C | 2.26150  | 0.92510  | 1.03740  |
| C | 2.79340  | 1.02230  | -0.24950 |
| C | 2.22070  | 0.13200  | -1.32350 |
| C | 1.70950  | -1.22260 | -0.80450 |
| C | 2.78570  | -2.32270 | -0.67680 |
| C | 3.93710  | -2.07550 | 0.30290  |
| C | 4.29330  | 2.91630  | 0.27810  |
| C | -0.13620 | -1.94920 | 0.78380  |
| C | -1.44620 | -1.53520 | 0.12740  |
| C | -5.55710 | 0.04690  | -0.39530 |
| H | 0.77880  | -0.04900 | 2.25350  |
| H | 2.52140  | 1.61830  | 1.82640  |
| H | 1.38650  | 0.68610  | -1.77430 |
| H | 2.95350  | -0.04170 | -2.11690 |
| H | 0.97640  | -1.58290 | -1.53050 |
| H | 5.03690  | 3.47880  | -0.28650 |
| H | 3.18690  | -2.47290 | -1.68730 |
| H | 2.27930  | -3.25810 | -0.40920 |
| H | 4.60090  | -2.94740 | 0.31580  |
| H | 4.54320  | -1.20790 | 0.02110  |
| H | 3.52650  | 3.60670  | 0.64540  |
| H | 4.78180  | 2.43870  | 1.13330  |
| H | 3.57780  | -1.92290 | 1.32630  |
| H | 0.12390  | -2.95340 | 0.43760  |
| H | -0.25760 | -1.98420 | 1.86960  |
| H | -1.33140 | -1.44110 | -0.95690 |
| H | -2.20300 | -2.29860 | 0.34030  |
| H | -6.28760 | -0.68810 | -0.05140 |
| H | -5.47440 | -0.00240 | -1.48580 |
| H | -5.88100 | 1.04850  | -0.09270 |
| H | 4.00120  | 1.92520  | -1.57870 |
| N | 0.97140  | -1.03740 | 0.47270  |
| N | 3.71050  | 1.91410  | -0.60770 |
| O | -4.30280 | -0.29890 | 0.22870  |
| O | -1.85940 | -0.27410 | 0.69020  |
| O | -3.07600 | 1.92750  | 0.77040  |
| O | -2.73300 | 0.74690  | -1.54200 |
| P | -2.98840 | 0.65470  | -0.04810 |

favilipd model compound conf #06

Energy at B3LYP/6-31+G(d,p)/SMD(MeOH): -1183.7636565 Hartree

|   |          |          |          |
|---|----------|----------|----------|
| C | 1.29970  | 0.67030  | 1.41450  |
| C | 2.28220  | 1.47570  | 0.83880  |
| C | 3.21570  | 0.89200  | -0.02070 |
| C | 3.17260  | -0.60380 | -0.18740 |
| C | 1.75290  | -1.17890 | -0.09380 |
| C | 1.77340  | -2.71570 | -0.07250 |
| C | 2.44270  | -3.33160 | -1.30770 |
| C | 4.42700  | 2.99530  | -0.49060 |
| C | -0.13870 | -1.24690 | 1.65780  |
| C | -1.35330 | -1.17920 | 0.74060  |
| C | -5.50740 | 0.20420  | -0.08530 |
| H | 0.65860  | 1.09290  | 2.18220  |
| H | 2.33140  | 2.51670  | 1.13000  |
| H | 3.61010  | -0.88700 | -1.14690 |
| H | 3.80250  | -1.04070 | 0.60180  |
| H | 1.18010  | -0.84350 | -0.97190 |
| H | 2.28380  | -3.05450 | 0.83830  |

|   |          |          |          |
|---|----------|----------|----------|
| H | 0.74760  | -3.09120 | -0.02680 |
| H | 2.29980  | -4.41740 | -1.30160 |
| H | 2.00170  | -2.94390 | -2.23400 |
| H | 3.52040  | -3.14340 | -1.33940 |
| H | 3.54570  | 3.56040  | -0.80940 |
| H | 4.66430  | 3.25880  | 0.54550  |
| H | 5.27050  | 3.26170  | -1.12750 |
| H | 0.07660  | -2.29300 | 1.88290  |
| H | -0.36470 | -0.74770 | 2.60260  |
| H | -1.15940 | -1.65560 | -0.22440 |
| H | -2.18370 | -1.69930 | 1.23160  |
| H | -6.18420 | -0.11350 | 0.71050  |
| H | -5.59700 | -0.47930 | -0.93570 |
| H | -5.76770 | 1.22130  | -0.39780 |
| H | 4.83300  | 1.03410  | -1.20410 |
| N | 1.06050  | -0.60080 | 1.09900  |
| N | 4.19220  | 1.56060  | -0.62070 |
| O | -4.17540 | 0.16080  | 0.46760  |
| O | -1.69190 | 0.20770  | 0.53580  |
| O | -2.86300 | 2.14070  | -0.58130 |
| O | -2.88270 | -0.20720 | -1.74290 |
| P | -2.90900 | 0.62940  | -0.47670 |

favilipd model compound conf #07

Energy at B3LYP/6-31+G(d,p)/SMD(MeOH): -1183.7635054 Hartree

|   |          |          |          |
|---|----------|----------|----------|
| C | 1.92800  | 0.01090  | 1.61320  |
| C | 3.06340  | 0.68210  | 1.14990  |
| C | 3.21010  | 0.88480  | -0.22660 |
| C | 2.08760  | 0.42970  | -1.12740 |
| C | 1.41370  | -0.84320 | -0.60000 |
| C | 2.28790  | -2.09710 | -0.81130 |
| C | 1.64430  | -3.42440 | -0.40050 |
| C | 5.35400  | 2.10500  | -0.04280 |
| C | -0.18690 | -1.17120 | 1.38090  |
| C | -1.28180 | -0.11410 | 1.46240  |
| C | -5.35100 | 1.25810  | 0.36260  |
| H | 1.69930  | 0.01250  | 2.67640  |
| H | 3.75280  | 1.09730  | 1.87320  |
| H | 1.35640  | 1.24830  | -1.17390 |
| H | 2.44760  | 0.25780  | -2.14580 |
| H | 0.46710  | -0.97410 | -1.12730 |
| H | 6.05650  | 2.52020  | -0.76560 |
| H | 3.24130  | -1.97080 | -0.28380 |
| H | 2.52360  | -2.12680 | -1.88250 |
| H | 2.30650  | -4.25710 | -0.66250 |
| H | 1.46450  | -3.47930 | 0.67850  |
| H | 5.01160  | 2.90450  | 0.62280  |
| H | 5.86320  | 1.33980  | 0.55110  |
| H | 0.68920  | -3.58470 | -0.91450 |
| H | -0.51520 | -1.99990 | 0.75250  |
| H | -0.00420 | -1.55460 | 2.39030  |
| H | -2.16560 | -0.56310 | 1.92560  |
| H | -0.95540 | 0.73320  | 2.07410  |
| H | -5.69230 | 2.05290  | 1.02900  |
| H | -5.75790 | 0.29910  | 0.69830  |
| H | -5.69210 | 1.46920  | -0.65670 |
| H | 4.22260  | 1.65130  | -1.78300 |
| N | 1.07850  | -0.65170 | 0.83830  |
| N | 4.23470  | 1.52410  | -0.77720 |
| O | -3.90950 | 1.25440  | 0.43380  |
| O | -1.59080 | 0.40370  | 0.15030  |
| O | -2.96480 | 0.73450  | -1.93200 |
| O | -3.59200 | -1.20730 | -0.29070 |
| P | -3.07130 | 0.20070  | -0.51710 |

favilipd model compound conf #08

Energy at B3LYP/6-31+G(d,p)/SMD(MeOH): -1183.7634115 Hartree

|   |          |          |          |
|---|----------|----------|----------|
| C | 1.78020  | -0.14540 | 1.75500  |
| C | 2.80790  | 0.68650  | 1.30050  |
| C | 2.92000  | 0.93050  | -0.07170 |
| C | 1.85450  | 0.36210  | -0.97510 |
| C | 1.33160  | -0.99190 | -0.47950 |
| C | 2.28980  | -2.18080 | -0.70650 |
| C | 2.50560  | -2.51660 | -2.18560 |
| C | 4.89680  | 2.40230  | 0.12810  |
| C | -0.08710 | -1.69360 | 1.52130  |
| C | -1.39510 | -0.92730 | 1.64790  |
| C | -4.14180 | 1.19720  | -2.13610 |



|   |          |          |          |
|---|----------|----------|----------|
| H | 1.57940  | -0.21630 | 2.82120  |
| H | 3.44430  | 1.17060  | 2.02950  |
| H | 1.02870  | 1.08640  | -0.99280 |
| H | 2.21870  | 0.26920  | -2.00090 |
| H | 0.39130  | -1.19660 | -0.99530 |
| H | 5.53280  | 2.92390  | -0.58720 |
| H | 1.86030  | -3.05360 | -0.20120 |
| H | 3.25140  | -1.97490 | -0.22040 |
| H | 3.12250  | -3.41690 | -2.28080 |
| H | 1.55210  | -2.71020 | -2.69170 |
| H | 4.45990  | 3.13290  | 0.81710  |
| H | 5.50690  | 1.69490  | 0.69850  |
| H | 3.01660  | -1.71170 | -2.72460 |
| H | -0.22160 | -2.56800 | 0.87980  |
| H | 0.19810  | -2.04380 | 2.51780  |
| H | -2.13390 | -1.57550 | 2.13410  |
| H | -1.25210 | -0.02840 | 2.25810  |
| H | -3.86560 | 1.18530  | -3.19210 |
| H | -4.23120 | 2.23390  | -1.79510 |
| H | -5.09620 | 0.67800  | -2.00260 |
| H | 3.82160  | 1.84330  | -1.61780 |
| N | 1.01120  | -0.88780 | 0.96950  |
| N | 3.85560  | 1.70000  | -0.61480 |
| O | -3.08370 | 0.51360  | -1.43070 |
| O | -1.85480 | -0.55800 | 0.33310  |
| O | -4.44060 | -0.40880 | 0.58650  |
| O | -2.97470 | 1.72460  | 0.86990  |
| P | -3.19980 | 0.37880  | 0.20030  |

favilipd model compound conf #09

Energy at B3LYP/6-31+G(d,p)/SMD(MeOH): -1183.7632852 Hartree

|   |          |          |          |
|---|----------|----------|----------|
| C | 1.19600  | 0.04410  | 1.34260  |
| C | 1.93380  | 1.20080  | 1.07290  |
| C | 2.43980  | 1.39170  | -0.21650 |
| C | 2.10330  | 0.35960  | -1.26550 |
| C | 2.00610  | -1.05030 | -0.66780 |
| C | 3.39430  | -1.63800 | -0.33790 |
| C | 3.39630  | -3.08280 | 0.16860  |
| C | 3.44820  | 3.59530  | 0.27310  |
| C | 0.16810  | -2.08800 | 0.77600  |
| C | -1.13160 | -1.89470 | 0.00600  |
| C | -4.37890 | 2.05940  | 0.46550  |
| H | 0.62900  | -0.02780 | 2.26660  |
| H | 2.01180  | 1.95770  | 1.84230  |
| H | 1.14000  | 0.64910  | -1.70690 |
| H | 2.84420  | 0.36350  | -2.07040 |
| H | 1.50780  | -1.69780 | -1.39370 |
| H | 4.03940  | 4.30710  | -0.30300 |
| H | 3.89850  | -0.99150 | 0.39070  |
| H | 3.97800  | -1.58020 | -1.26510 |
| H | 4.42710  | -3.43190 | 0.29540  |
| H | 2.89850  | -3.18060 | 1.13930  |
| H | 2.53790  | 4.09080  | 0.62700  |
| H | 4.03210  | 3.26330  | 1.13730  |
| H | 2.90180  | -3.75840 | -0.53950 |
| H | 0.61130  | -3.03790 | 0.46980  |
| H | -0.03760 | -2.13380 | 1.84890  |
| H | -0.93540 | -1.79580 | -1.06740 |
| H | -1.77130 | -2.76930 | 0.17180  |
| H | -4.34480 | 2.80570  | 1.26150  |
| H | -5.33770 | 1.53200  | 0.50110  |
| H | -4.26240 | 2.55520  | -0.50380 |
| H | 3.41400  | 2.52290  | -1.56170 |
| N | 1.13470  | -1.00960 | 0.53820  |
| N | 3.12320  | 2.46620  | -0.59210 |
| O | -3.28460 | 1.15100  | 0.71220  |
| O | -1.78270 | -0.71000 | 0.50290  |
| O | -2.62340 | 0.40250  | -1.69080 |
| O | -4.24260 | -1.05870 | -0.27130 |
| P | -3.06490 | -0.09990 | -0.32600 |

favilipd model compound conf #10

Energy at B3LYP/6-31+G(d,p)/SMD(MeOH): -1183.7632841 Hartree

|   |          |          |          |
|---|----------|----------|----------|
| C | -0.93440 | 0.42410  | -1.05210 |
| C | -1.92610 | 1.38520  | -0.82770 |
| C | -2.82760 | 1.19160  | 0.22190  |
| C | -2.61510 | -0.00310 | 1.11910  |
| C | -2.05350 | -1.21000 | 0.35640  |

|   |          |          |          |
|---|----------|----------|----------|
| C | -3.07650 | -1.94520 | -0.53600 |
| C | -4.18730 | -2.64500 | 0.25370  |
| C | -4.08370 | 3.28350  | -0.17920 |
| C | 0.20740  | -1.70140 | -0.69530 |
| C | 1.22110  | -1.69080 | 0.44480  |
| C | 4.60390  | 2.17580  | 0.19060  |
| H | -0.12830 | 0.63600  | -1.74880 |
| H | -1.91980 | 2.28560  | -1.42780 |
| H | -1.90160 | 0.30270  | 1.89640  |
| H | -3.54080 | -0.28090 | 1.62880  |
| H | -1.65910 | -1.91680 | 1.09150  |
| H | -4.96240 | 3.74340  | 0.27300  |
| H | -2.52990 | -2.69350 | -1.12140 |
| H | -3.51020 | -1.23770 | -1.25310 |
| H | -4.82680 | -3.21910 | -0.42560 |
| H | -3.77150 | -3.34330 | 0.99030  |
| H | -3.23850 | 3.97560  | -0.10190 |
| H | -4.28760 | 3.08800  | -1.23670 |
| H | -4.83010 | -1.93560 | 0.78580  |
| H | -0.19990 | -2.71340 | -0.78870 |
| H | 0.69660  | -1.44110 | -1.63650 |
| H | 0.73660  | -1.90810 | 1.40100  |
| H | 1.97040  | -2.46740 | 0.25830  |
| H | 4.41620  | 3.19140  | 0.54410  |
| H | 4.82680  | 2.19850  | -0.88120 |
| H | 5.45100  | 1.75000  | 0.73800  |
| H | -4.37750 | 1.82200  | 1.33550  |
| N | -0.90370 | -0.76960 | -0.47640 |
| N | -3.80400 | 2.03870  | 0.52840  |
| O | 3.39770  | 1.42550  | 0.44810  |
| O | 1.83630  | -0.39300 | 0.58310  |
| O | 4.35940  | -0.95850 | 0.85090  |
| O | 3.41750  | -0.31410 | -1.48640 |
| P | 3.36550  | -0.15910 | 0.02480  |

favilipd model compound conf #11

Energy at B3LYP/6-31+G(d,p)/SMD(MeOH): -1183.7632499 Hartree

|   |          |          |          |
|---|----------|----------|----------|
| C | -1.51970 | -1.51660 | -0.28250 |
| C | -2.68140 | -1.33980 | 0.47560  |
| C | -3.51870 | -0.26070 | 0.17750  |
| C | -3.14350 | 0.61480  | -0.99370 |
| C | -1.62140 | 0.75330  | -1.13000 |
| C | -0.98810 | 1.64960  | -0.04100 |
| C | -1.38150 | 3.12520  | -0.17120 |
| C | -5.21680 | -0.82260 | 1.88430  |
| C | 0.10910  | -0.93600 | -1.99780 |
| C | 1.45600  | -0.36400 | -1.58020 |
| C | 4.13510  | 1.78930  | 1.23210  |
| H | -0.97410 | -2.45340 | -0.21580 |
| H | -2.94720 | -2.09700 | 1.20150  |
| H | -3.55800 | 0.14400  | -1.89570 |
| H | -3.60410 | 1.60170  | -0.90860 |
| H | -1.39970 | 1.17920  | -2.11230 |
| H | -6.14350 | -0.35590 | 2.21850  |
| H | 0.09920  | 1.56590  | -0.11200 |
| H | -1.26510 | 1.27350  | 0.95100  |
| H | -0.84190 | 3.72300  | 0.57130  |
| H | -1.12710 | 3.51750  | -1.16350 |
| H | -5.43200 | -1.84100 | 1.54370  |
| H | -4.51690 | -0.86830 | 2.72450  |
| H | -2.45170 | 3.29020  | -0.00720 |
| H | 0.17950  | -2.02500 | -2.05110 |
| H | -0.12440 | -0.56380 | -3.00090 |
| H | 2.19870  | -0.68300 | -2.31930 |
| H | 1.44380  | 0.72950  | -1.54860 |
| H | 3.75500  | 2.79520  | 1.42150  |
| H | 4.92900  | 1.83440  | 0.47980  |
| H | 4.53030  | 1.37000  | 2.16360  |
| H | -5.21520 | 0.77290  | 0.48050  |
| N | -1.02010 | -0.60930 | -1.11280 |
| N | -4.66550 | -0.01650 | 0.80000  |
| O | 3.01780  | 1.01290  | 0.75160  |
| O | 1.79260  | -0.89060 | -0.28180 |
| O | 3.28900  | -1.39950 | 1.67680  |
| O | 4.37120  | -0.72070 | -0.60980 |
| P | 3.24840  | -0.58010 | 0.40240  |

favilipd model compound conf #12

Energy at B3LYP/6-31+G(d,p)/SMD(MeOH): -1183.7631985 Hartree

|   |          |          |          |
|---|----------|----------|----------|
| C | 1.32020  | 0.34420  | 1.36870  |
| C | 2.23400  | 1.31270  | 0.95310  |
| C | 3.13180  | 1.00460  | -0.07350 |
| C | 3.15000  | -0.41410 | -0.57260 |
| C | 1.76210  | -1.06680 | -0.55270 |
| C | 1.83320  | -2.55140 | -0.94960 |
| C | 2.69230  | -3.45790 | -0.06020 |
| C | 4.19850  | 3.23420  | -0.11680 |
| C | -0.05840 | -1.62620 | 1.17230  |
| C | -1.30770 | -1.33670 | 0.34940  |
| C | -5.49260 | 0.08920  | -0.09610 |
| H | 0.70620  | 0.54530  | 2.24140  |
| H | 2.25830  | 2.25710  | 1.48120  |
| H | 3.54410  | -0.46360 | -1.59140 |
| H | 3.84360  | -0.96750 | 0.07440  |
| H | 1.13110  | -0.55360 | -1.29350 |
| H | 0.81710  | -2.95240 | -1.01860 |
| H | 2.22510  | -2.56850 | -1.97360 |
| H | 2.60930  | -4.49500 | -0.40350 |
| H | 3.75260  | -3.18760 | -0.09660 |
| H | 2.37650  | -3.43090 | 0.98880  |
| H | 3.27260  | 3.80050  | -0.25770 |
| H | 4.48350  | 3.27280  | 0.93980  |
| H | 4.98820  | 3.68850  | -0.71510 |
| H | 0.17490  | -2.68890 | 1.08700  |
| H | -0.25390 | -1.41550 | 2.22630  |
| H | -1.13890 | -1.51470 | -0.71640 |
| H | -2.10880 | -1.99910 | 0.69660  |
| H | -6.15760 | -0.49380 | 0.54430  |
| H | -5.54880 | -0.28940 | -1.12170 |
| H | -5.79680 | 1.14120  | -0.07190 |
| H | 4.65000  | 1.51570  | -1.28470 |
| N | 1.11230  | -0.82860 | 0.77110  |
| N | 4.02860  | 1.85330  | -0.55830 |
| O | -4.16220 | -0.07390 | 0.43780  |
| O | -1.68330 | 0.03970  | 0.55890  |
| O | -2.92300 | 2.18160  | 0.08400  |
| O | -2.84690 | 0.32030  | -1.75540 |
| P | -2.91130 | 0.71300  | -0.29060 |

favilipd model compound conf #13

Energy at B3LYP/6-31+G(d,p)/SMD(MeOH): -1183.7631374 Hartree

|   |          |          |          |
|---|----------|----------|----------|
| C | 1.55640  | 0.08520  | -1.52040 |
| C | 2.54430  | -0.83300 | -1.15410 |
| C | 2.82400  | -1.02040 | 0.20130  |
| C | 1.95170  | -0.31640 | 1.20990  |
| C | 1.39940  | 1.03460  | 0.72480  |
| C | 2.34560  | 2.23730  | 0.92890  |
| C | 3.69060  | 2.21230  | 0.19610  |
| C | 4.62740  | -2.67080 | -0.17520 |
| C | -0.13080 | 1.80070  | -1.16280 |
| C | -1.48740 | 1.11320  | -1.19820 |
| C | -4.08180 | -2.36440 | -0.45670 |
| H | 1.24190  | 0.14140  | -2.55960 |
| H | 3.03380  | -1.40440 | -1.93170 |
| H | 1.11420  | -0.99360 | 1.42450  |
| H | 2.48950  | -0.16580 | 2.15070  |
| H | 0.49870  | 1.23760  | 1.30710  |
| H | 5.31810  | -3.20460 | 0.47770  |
| H | 2.51660  | 2.30640  | 2.01100  |
| H | 1.79960  | 3.14670  | 0.64960  |
| H | 4.24150  | 3.13550  | 0.40910  |
| H | 4.32090  | 1.37500  | 0.51420  |
| H | 4.04510  | -3.39840 | -0.75050 |
| H | 5.20120  | -2.04640 | -0.86720 |
| H | 3.56390  | 2.15080  | -0.89020 |
| H | -0.16960 | 2.67580  | -0.51080 |
| H | 0.10400  | 2.14220  | -2.17560 |
| H | -2.22330 | 1.81120  | -1.61190 |
| H | -1.44880 | 0.21880  | -1.83000 |
| H | -3.64780 | -3.26450 | -0.89680 |
| H | -4.83220 | -1.94990 | -1.13720 |
| H | -4.54980 | -2.61890 | 0.50040  |
| H | 3.85590  | -1.93610 | 1.66330  |
| N | 0.95620  | 0.92790  | -0.69130 |
| N | 3.75660  | -1.84810 | 0.65810  |
| O | -2.99410 | -1.43530 | -0.26840 |

|   |          |          |          |
|---|----------|----------|----------|
| O | -1.86130 | 0.74130  | 0.14440  |
| O | -3.38720 | -0.13430 | 1.94500  |
| O | -4.42740 | 0.71810  | -0.30360 |
| P | -3.30260 | 0.01960  | 0.43910  |

favilipd model compound conf #14

Energy at B3LYP/6-31+G(d,p)/SMD(MeOH): -1183.7624681 Hartree

|   |          |          |          |
|---|----------|----------|----------|
| C | -1.86310 | -0.95700 | 1.15080  |
| C | -3.16150 | -1.32330 | 0.78730  |
| C | -3.75630 | -0.69760 | -0.31290 |
| C | -2.91620 | 0.26800  | -1.11160 |
| C | -1.92580 | 1.04290  | -0.23250 |
| C | -2.56170 | 2.16080  | 0.62170  |
| C | -3.11010 | 3.32520  | -0.20960 |
| C | -5.88700 | -1.94010 | -0.14290 |
| C | 0.17400  | 0.37740  | 1.03560  |
| C | 1.15730  | -0.20090 | 0.01770  |
| C | 6.25350  | 0.38610  | 0.17860  |
| H | -1.32760 | -1.54120 | 1.89460  |
| H | -3.64290 | -2.12910 | 1.32550  |
| H | -2.36300 | -0.32500 | -1.85280 |
| H | -3.54570 | 0.96630  | -1.66790 |
| H | -1.17160 | 1.48820  | -0.88670 |
| H | -6.83000 | -1.91210 | -0.68870 |
| H | -1.79130 | 2.54160  | 1.30210  |
| H | -3.35530 | 1.73590  | 1.24830  |
| H | -3.47280 | 4.12030  | 0.45090  |
| H | -2.33190 | 3.75440  | -0.85230 |
| H | -5.46910 | -2.95050 | -0.20320 |
| H | -6.07400 | -1.69390 | 0.90700  |
| H | -3.94750 | 3.02410  | -0.84820 |
| H | 0.29950  | 1.46210  | 1.09580  |
| H | 0.36610  | -0.04700 | 2.02450  |
| H | 1.09660  | -1.29530 | 0.01580  |
| H | 0.94200  | 0.17140  | -0.98980 |
| H | 6.76850  | 1.20520  | 0.68390  |
| H | 6.50960  | 0.39780  | -0.88610 |
| H | 6.55660  | -0.56670 | 0.62390  |
| H | -5.30600 | -0.47860 | -1.57280 |
| N | -1.21130 | 0.08760  | 0.65560  |
| N | -4.98190 | -0.96650 | -0.74520 |
| O | 4.84100  | 0.61420  | 0.37020  |
| O | 2.46940  | 0.22890  | 0.42580  |
| O | 4.02260  | -1.84630 | 0.20220  |
| O | 3.70340  | -0.23120 | -1.81440 |
| P | 3.78210  | -0.43670 | -0.31060 |

favilipd model compound conf #15

Energy at B3LYP/6-31+G(d,p)/SMD(MeOH): -1183.7623296 Hartree

|   |          |          |          |
|---|----------|----------|----------|
| C | -1.84030 | 0.43870  | 1.51330  |
| C | -2.77620 | -0.55930 | 1.22870  |
| C | -2.80180 | -1.11150 | -0.05640 |
| C | -1.76440 | -0.63930 | -1.04580 |
| C | -1.40960 | 0.83920  | -0.84180 |
| C | -2.52100 | 1.78240  | -1.34790 |
| C | -2.19610 | 3.27710  | -1.27730 |
| C | -4.61850 | -2.71550 | 0.43540  |
| C | -0.02480 | 1.97470  | 1.00000  |
| C | 1.26290  | 1.24380  | 1.35100  |
| C | 4.11930  | -1.68010 | -1.75860 |
| H | -1.67360 | 0.73920  | 2.54490  |
| H | -3.39320 | -0.93730 | 2.03330  |
| H | -0.87100 | -1.26170 | -0.89980 |
| H | -2.10410 | -0.79410 | -2.07380 |
| H | -0.48780 | 1.04850  | -1.38800 |
| H | -5.15940 | -3.45620 | -0.15360 |
| H | -3.44970 | 1.58030  | -0.80020 |
| H | -2.70560 | 1.50250  | -2.39260 |
| H | -3.00610 | 3.85700  | -1.73370 |
| H | -2.08710 | 3.62790  | -0.24550 |
| H | -4.13680 | -3.21520 | 1.28250  |
| H | -5.32830 | -1.97410 | 0.81530  |
| H | -1.27230 | 3.51400  | -1.81820 |
| H | 0.15520  | 2.67710  | 0.18530  |
| H | -0.34450 | 2.54290  | 1.87940  |
| H | 1.99710  | 1.97960  | 1.70030  |
| H | 1.08500  | 0.51210  | 2.14710  |
| H | 3.83240  | -1.98350 | -2.76720 |

|   |          |          |          |
|---|----------|----------|----------|
| H | 4.29390  | -2.57140 | -1.14670 |
| H | 5.03080  | -1.07560 | -1.80410 |
| H | -3.54030 | -2.43660 | -1.37400 |
| N | -1.11490 | 1.07110  | 0.59930  |
| N | -3.62620 | -2.08300 | -0.42780 |
| O | 3.01760  | -0.90610 | -1.23750 |
| O | 1.75540  | 0.57360  | 0.17410  |
| O | 4.34600  | 0.59970  | 0.41220  |
| O | 2.97120  | -1.41970 | 1.31360  |
| P | 3.13700  | -0.31160 | 0.28710  |

favilipd model compound conf #16

Energy at B3LYP/6-31+G(d,p)/SMD(MeOH): -1183.7621729 Hartree

|   |          |          |          |
|---|----------|----------|----------|
| C | 1.15900  | -0.00440 | 1.25970  |
| C | 2.00970  | 1.07020  | 0.98500  |
| C | 2.61180  | 1.15290  | -0.27150 |
| C | 2.22270  | 0.13620  | -1.31490 |
| C | 1.83590  | -1.23650 | -0.73780 |
| C | 3.02010  | -2.19300 | -0.47910 |
| C | 4.07260  | -1.75540 | 0.54420  |
| C | 3.84230  | 3.24080  | 0.21710  |
| C | -0.00520 | -2.08900 | 0.79140  |
| C | -1.31590 | -1.87540 | 0.04690  |
| C | -4.42420 | 2.19340  | 0.45710  |
| H | 0.57820  | -0.00270 | 2.17770  |
| H | 2.13320  | 1.83710  | 1.73830  |
| H | 1.36430  | 0.55810  | -1.85460 |
| H | 3.02510  | 0.00280  | -2.04660 |
| H | 1.19580  | -1.72150 | -1.47900 |
| H | 4.54500  | 3.85980  | -0.34080 |
| H | 3.49800  | -2.35370 | -1.45410 |
| H | 2.60880  | -3.16450 | -0.17940 |
| H | 4.82700  | -2.54270 | 0.65320  |
| H | 4.59560  | -0.84280 | 0.23890  |
| H | 2.97640  | 3.84920  | 0.49900  |
| H | 4.33210  | 2.87600  | 1.12540  |
| H | 3.63460  | -1.58340 | 1.53330  |
| H | 0.39240  | -3.07060 | 0.51990  |
| H | -0.18380 | -2.08100 | 1.86980  |
| H | -1.14690 | -1.82960 | -1.03480 |
| H | -1.98550 | -2.71480 | 0.26620  |
| H | -4.41490 | 2.90460  | 1.28520  |
| H | -5.41070 | 1.72230  | 0.39350  |
| H | -4.20160 | 2.71820  | -0.47750 |
| H | 3.79550  | 2.11220  | -1.58320 |
| N | 1.00180  | -1.06640 | 0.48150  |
| N | 3.43990  | 2.12620  | -0.63400 |
| O | -3.40480 | 1.21430  | 0.75000  |
| O | -1.90460 | -0.64480 | 0.51000  |
| O | -2.76400 | 0.49300  | -1.66530 |
| O | -4.36790 | -0.98790 | -0.24870 |
| P | -3.19280 | -0.02580 | -0.30260 |
